# Supplementary material for: Outcomes of hypothalamic oxytocin neuron-driven cardioprotection after acute myocardial infarction
Source: Springer Nature journal article supplement (doi:10.1007/s00395-023-01013-1), 2023-10-06

## Supplemental Figures

Supplemental figure 1

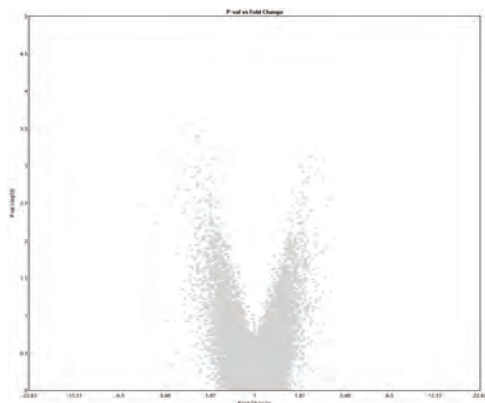

Supp fig 1. Volcano plot of DEGs between Sham and Sham + OXT groups.

Supplemental figure 2

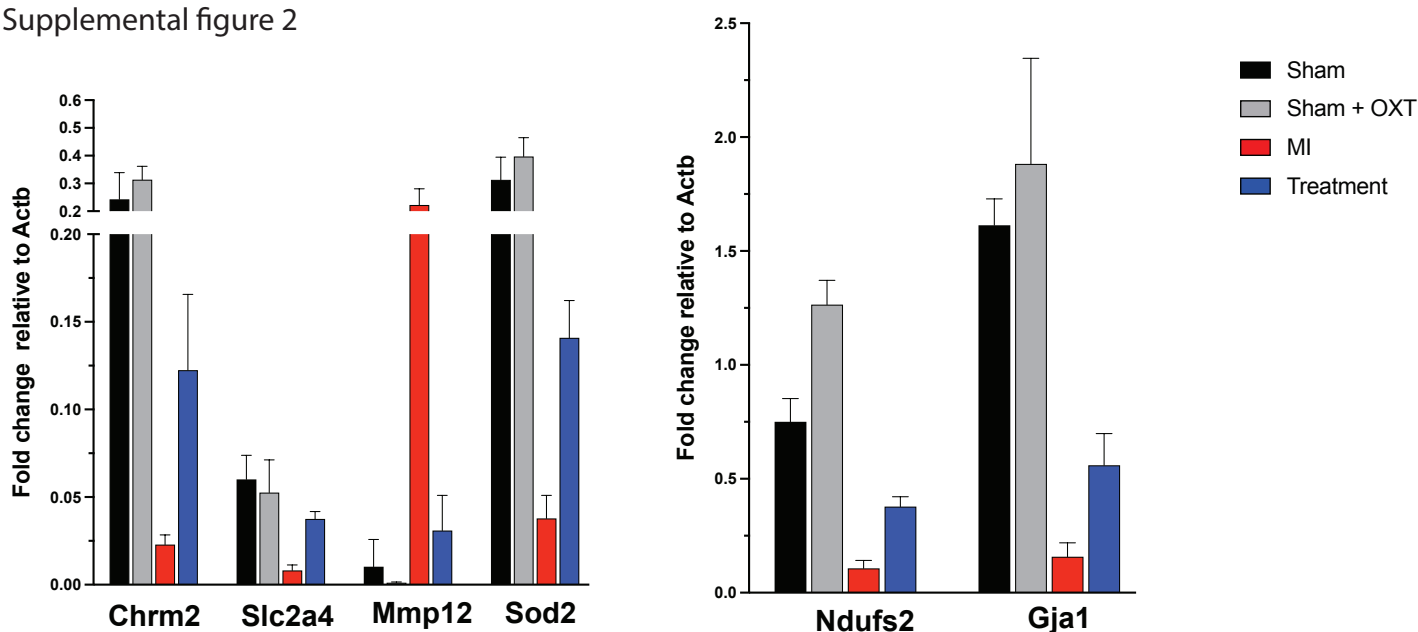

Supp fig 2. Semi-quantitative rt-PCR of select DEGs confirm microarray expression fold changes.

Supplemental figure 3

| Gene   | Forward (5' --> 3')           | Reverse (5' --> 3')           |
|--------|-------------------------------|-------------------------------|
| Actb   | CTT CCT TCC TGG GTA TGG AAT C | CTG TGT TGG CAT AGA GGT CTT   |
| Chrm2  | CAA GTC TGG GCC TAA TGG ATA G | GAA TGG CAG AGA GGG AAT CAA   |
| Slc2a4 | ACT TAG GGC CAG ATG AGA ATG   | GTA AGG GAA GAG AGG GCT AAA G |
| Mmp12  | CTG GTT CGG TTG TTA GGA AGA   | CCC TGA GCA TAC AGT GGA TAT G |
| Gja1   | CCT CAC CAA ACG GCT TCT ATC   | TCA CCT CCC TGA TGC TAA CT    |
| Sod2   | TAA GGA TGG ATG GAG TGG TAG A | CCT AGC TTG GGT CTG TTG ATT   |
| Ndufs2 | CGC CTT TCT TCT GGA TGT TTG   | ACT CCT CCT GGT CGG ATA TAA   |

Supp fig 3. Rat primer sequences used for qPCR of select DEGs.

Supplemental figure 4

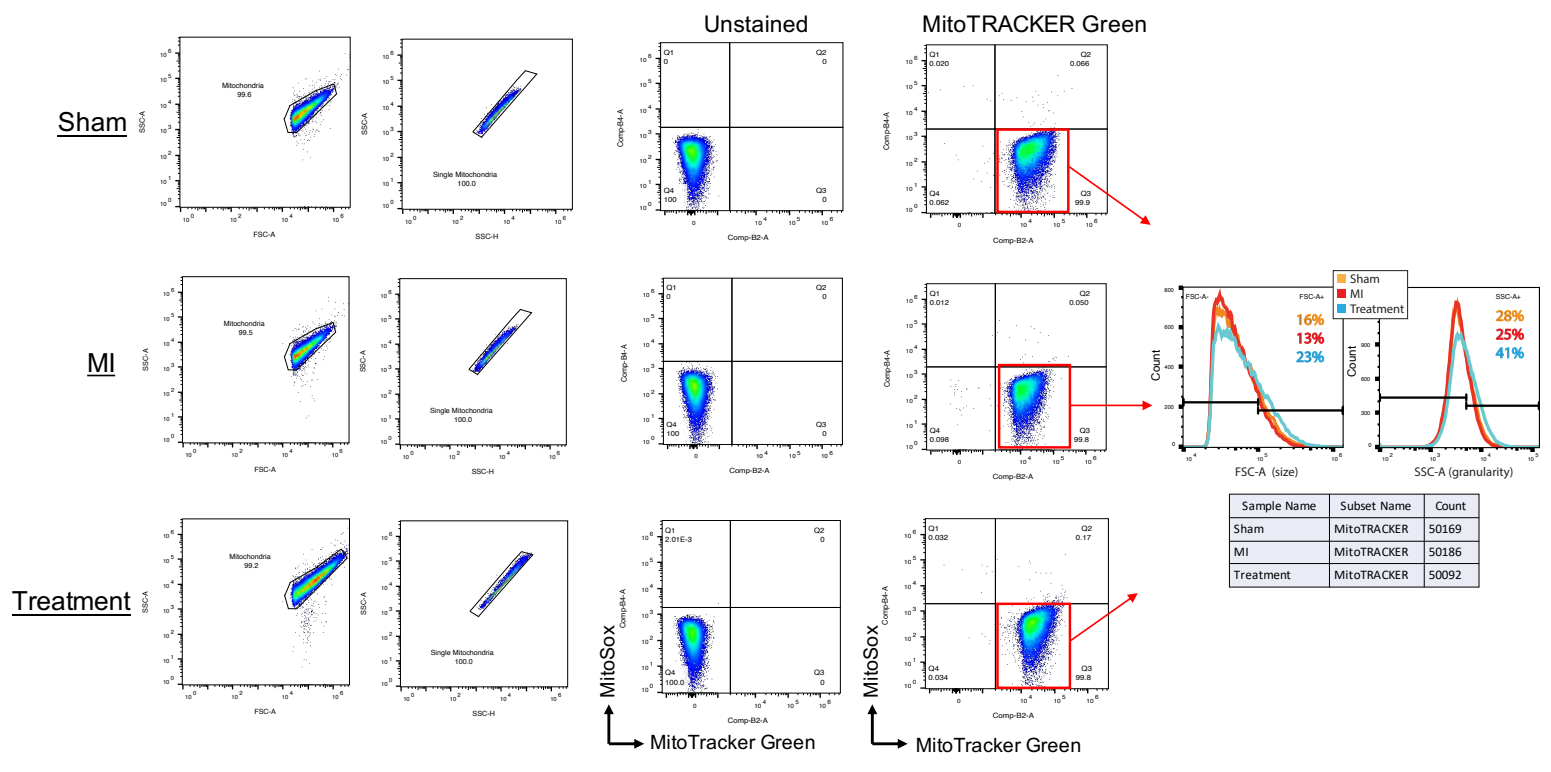

Supp fig 4. Representative gating strategy for flow cytometric mitochondrial forward and side scatter analysis depicting size and granularity, respectively. 50,000 +/- MitoTracker Green positive mitochondria per animal were included in distribution analysis.



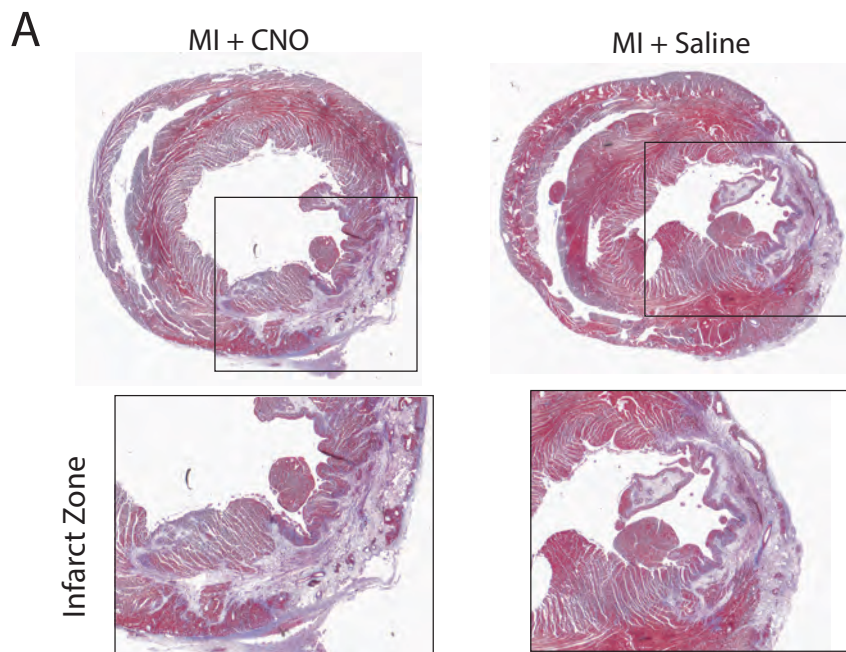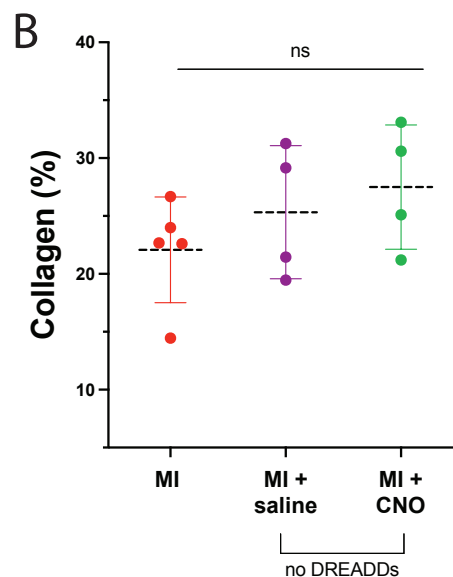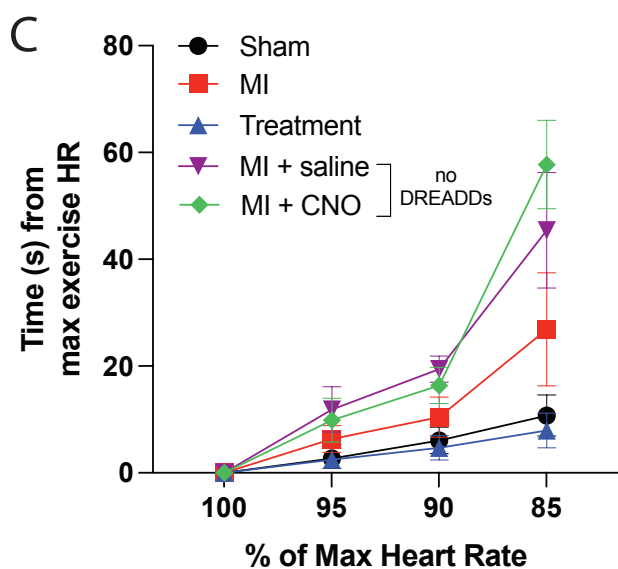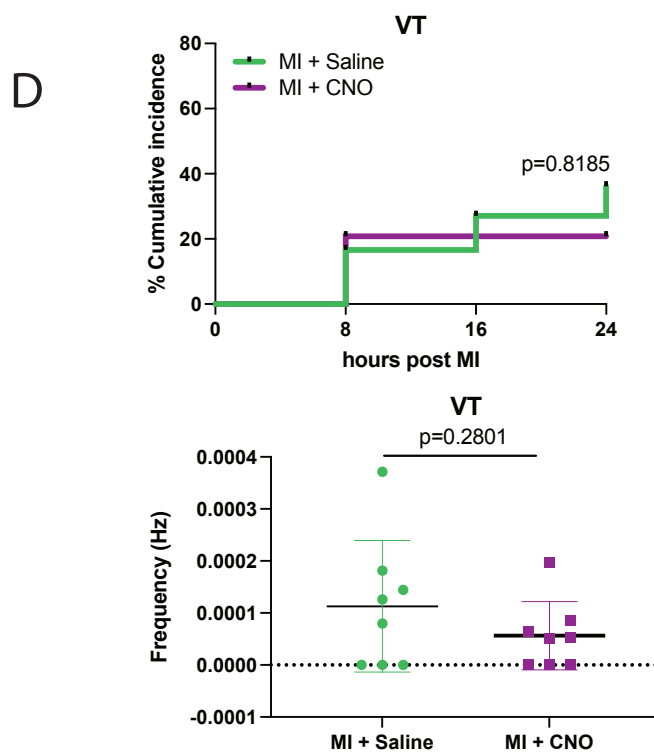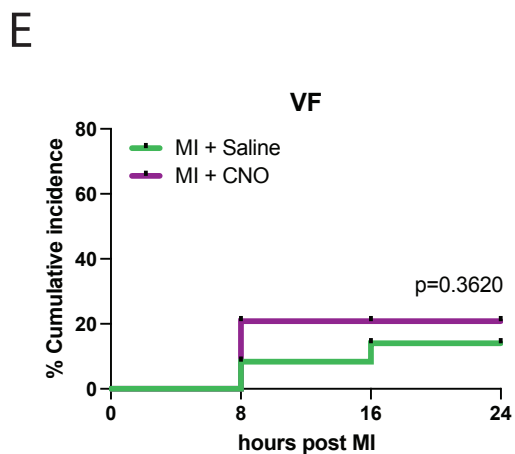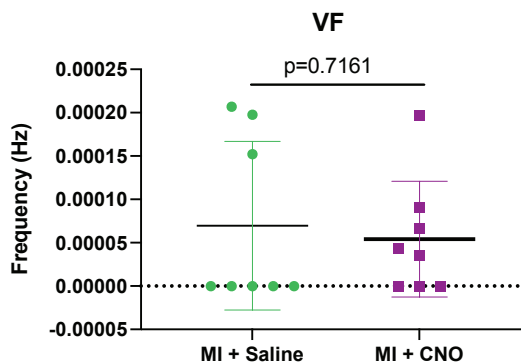

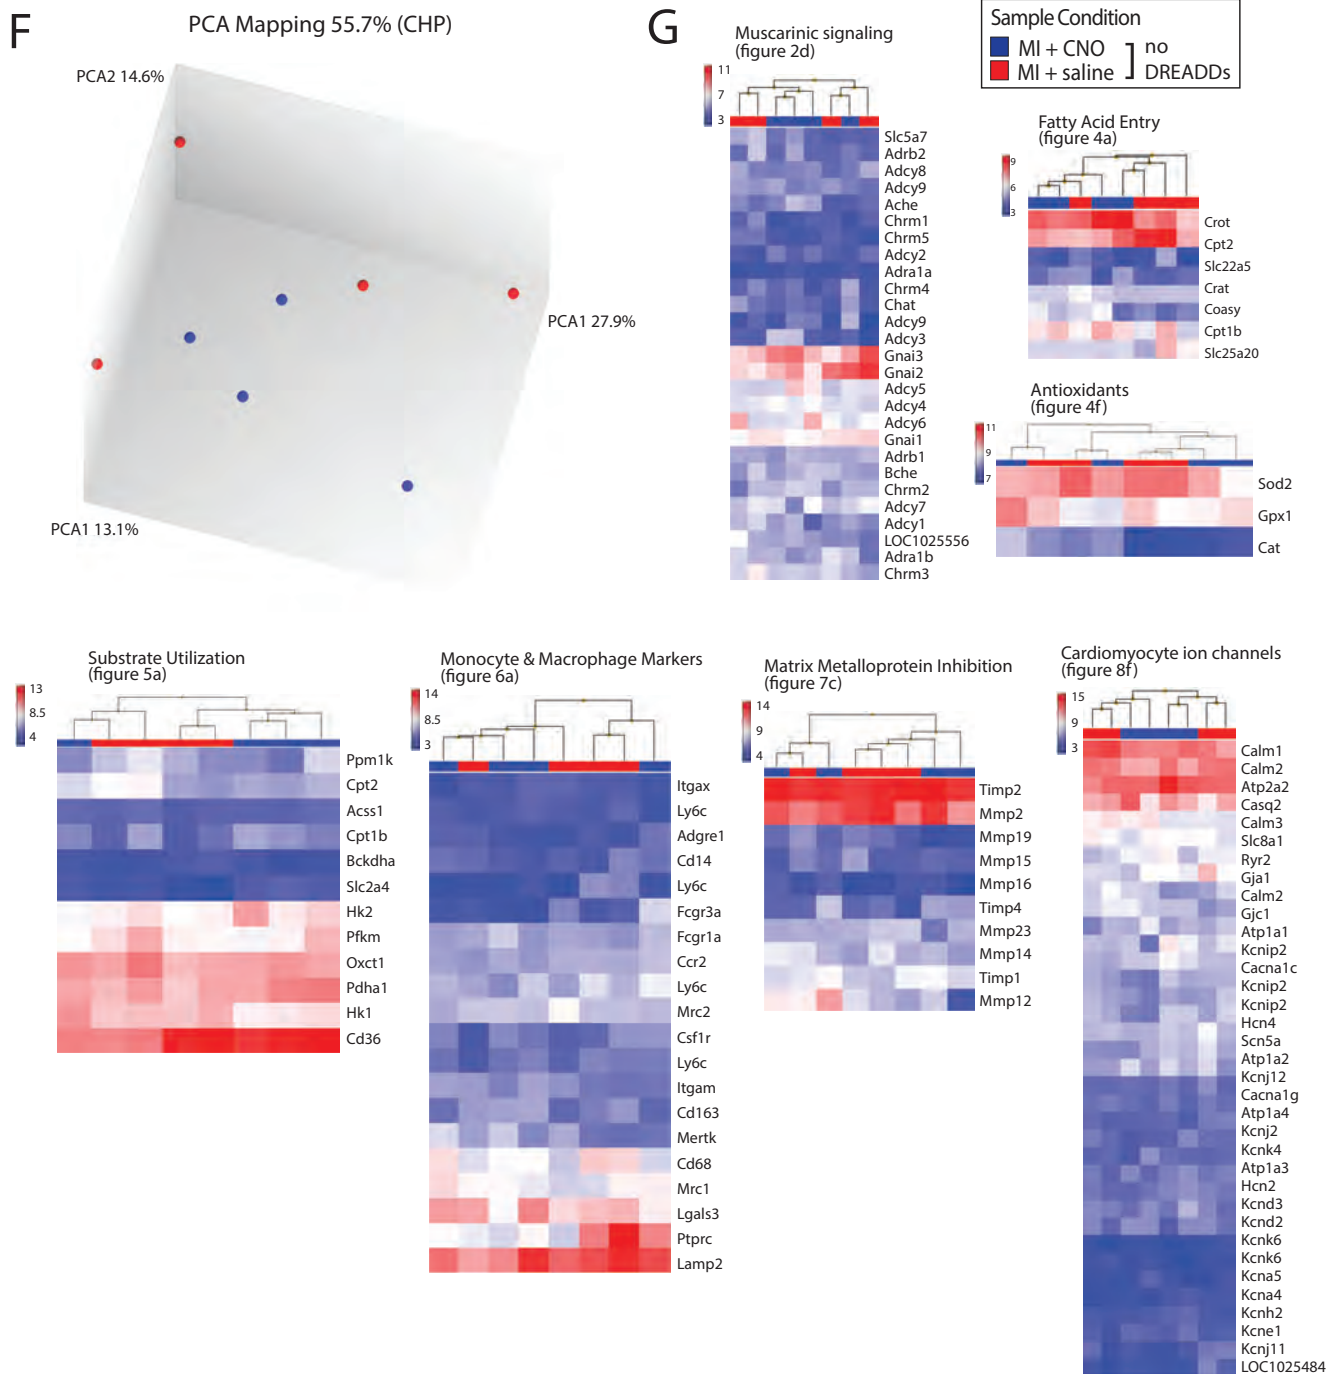

**Supp fig 5.** Select outcomes of additional control MI groups not expressing DREADDs and receiving either saline or CNO injections. **(A-B)** Representative Masson's trichrome images of myocardial sections from MI+saline and MI+CNO animals are shown in each column. Large and small bounding boxes on images of the full section (top row) indicate the bounding area of the high-resolution images for the infarct zone (bottom row). Blue denotes the presence of collagen. Percent collagen content **(B)** within a region of the infarct zone was measured using the trichrome images (MI + saline, n=4; MI + CNO, n=4; one-way ANOVA; mean±SD; \*p<0.05). **(C)** HRR time 5 days after MI as a percentage of HR at peak running effort (the maximum HR). Recovery time to 95%, 90%, and 85% of maximum HR was significantly longer for all 3 groups of MI animals compared to Sham or Treatment groups. HRR time was not significantly different between Treatment and Sham animals (Sham n=24; MI, n=9; Treatment, n=13; MI+saline, n=8; MI+CNO, n=8). **(D-E)** Cumulative incidence and frequency of **(D)** Ventricular Tachycardia (VT) and **(E)** Ventricular Fibrillation are not different between MI groups with or without DREADDs (n=8 each group). **(F)** Transcriptome PCA of MI animals not expressing DREADDs (MI+saline, n=4; MI+CNO, n=4). **(G)** Transcriptome expression heatmaps and hierarchical clustering of key pathways and genes involved in muscarinic signaling (main text figure 2d), mitochondrial respiration (main text figure 4a), antioxidants (main text figure 4f), substrate utilization (main text figure 5a), inflammation (main text figure 6a), ECM remodeling (main text figure 7c), and cardiomyocyte ion channels (main text figure 8f).

Supplemental figure 6

GAPDH (bottom portion of cut membrane includes 70 - 8 kDa; stripped after probing for Il-1b)

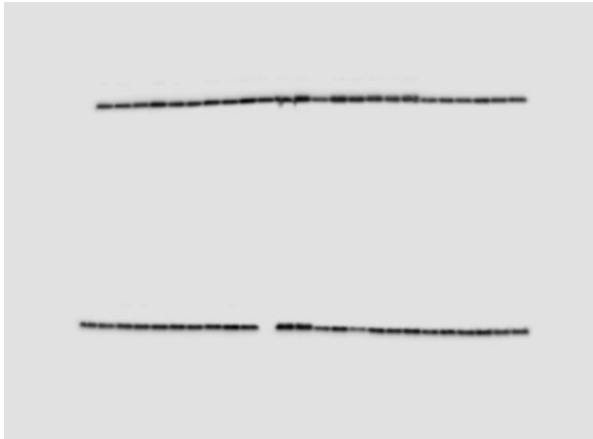

Il-1b (bottom portion of cut membrane includes 70 - 8 kDa)

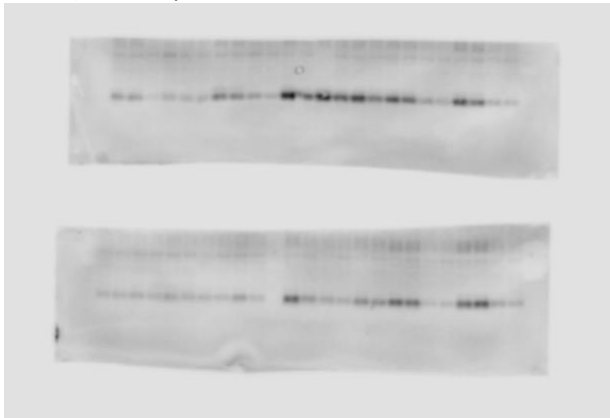

Serca2a (top portion of cut membrane includes 260 - 70 kDa)

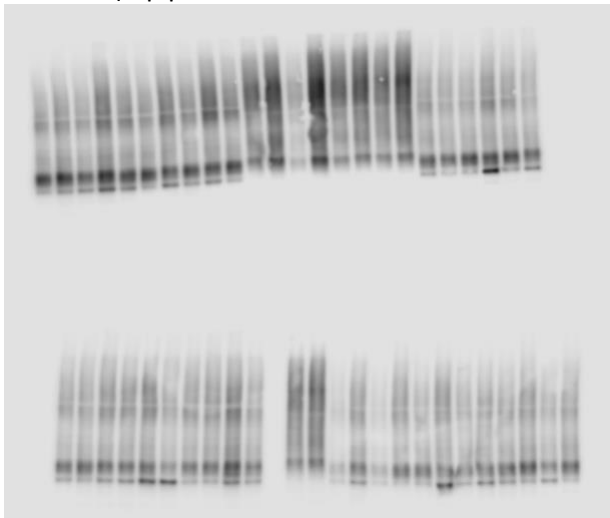

Supplement: MOESM1 [file 26136052]
